# Supplementary material for: Fluorescence enhancement of flavonoids and its application in ingredient determination for some traditional Chinese medicines by CE-LIF
Source: Royal Society of Chemistry journal article supplement (doi:10.1039/d3ay00486d), 2023-01-01
Supplement: d3ay00486d1.pdf [file d3ay00486d1.pdf]

## Electronic Supplementary Information

### Fluorescence enhancement of flavonoids and its application in the ingredient determination for some traditional Chinese medicines by CE-LIF

Shaoyan Zhang · Jinfeng Ning · Qingqing Wang · Wei Wang\*

Ministry of Education Key Laboratory for Analytical Science of Food Safety and Biology, and Fujian Provincial Key Laboratory of Analysis and Detection Technology for Food Safety, School of Chemistry, Fuzhou University, Fuzhou, 350116, P. R. China

**Table S1 Fluorescence lifetime parameters of  $1.0 \times 10^{-4}$  mol/L quercetin before and after derivatization**

| Samples        | $\tau_1$ /ns | Rel%  | $\tau_2$ /ns | Rel%  | $\tau_{\text{average}}$ /ns |
|----------------|--------------|-------|--------------|-------|-----------------------------|
| Quercetin      | 0.2918       | 93.22 | 3.0341       | 6.78  | 0.48                        |
| Quercetin+NaAC | 0.3130       | 83.31 | 2.9413       | 16.69 | 0.75                        |

**Table S2 The LODs and linear ranges for the flavonoids of different analysis methods**

| Kaempferide (LOD)     | Galangin (LOD)         | Isorhamnetin (LOD) | Kaempferol (LOD)       | Quercetin (LOD)        | Linear range              | Method     | Reference |
|-----------------------|------------------------|--------------------|------------------------|------------------------|---------------------------|------------|-----------|
| 0.298 $\mu\text{M}$   | 0.346 $\mu\text{M}$    | -                  | 0.564 $\mu\text{M}$    | 1.434 $\mu\text{M}$    | 2.5-100 $\mu\text{M}$     | CE-DAD     | 28        |
| 0.80 $\mu\text{M}$    | -                      | -                  | 0.83 $\mu\text{M}$     | 0.85 $\mu\text{M}$     | 4.0-40 $\mu\text{M}$      | CE-AD      | 29        |
| -                     | -                      | -                  | 3.1 mg/kg              | 3.3 mg/kg              | -                         | CE-DAD     | 30        |
| -                     | -                      | -                  | 15.8 $\mu\text{g/mL}$  | 19.1 $\mu\text{g/mL}$  | 50-1000 $\mu\text{g/mL}$  | HPLC-ELSD  | 14        |
| 0.08 $\mu\text{g/mL}$ | -                      | -                  | 0.03 $\mu\text{g/mL}$  | 0.07 $\mu\text{g/mL}$  | -                         | HPLC-DAD   | 31        |
| -                     | 0.3 $\mu\text{g/mL}$   | -                  | 0.3 $\mu\text{g/mL}$   | 0.2 $\mu\text{g/mL}$   | 1.0-50 $\mu\text{g/mL}$   | HPLC-UV    | 32        |
| -                     | 0.007 $\mu\text{g/mL}$ | -                  | 0.007 $\mu\text{g/mL}$ | 0.007 $\mu\text{g/mL}$ | 0.02-1.0 $\mu\text{g/mL}$ | HPLC-MS/MS | 32        |

DAD: Diode array detection; ELSD: Evaporative light scattering detection.

**Table S3 Recovery of flavonoids in aster**

| Analytes   | Added amount (µg/g) | Found amount (µg/g) | Recoveries | RSD (n = 3) |
|------------|---------------------|---------------------|------------|-------------|
| kaempferol | 0.573               | 0.540               | 94.2%      | 6.43%       |
|            | 0.573               | 0.603               | 105%       |             |
|            | 0.573               | 0.607               | 106%       |             |
| quercetin  | 0.600               | 0.593               | 98.8%      | 5.81%       |
|            | 0.600               | 0.627               | 105%       |             |
|            | 0.600               | 0.663               | 111%       |             |

**Table S4 Recovery of flavonoids in galangal**

| Analytes   | Added amount (µg/g) | Found amount (µg/g) | Recoveries | RSD (n = 3) |
|------------|---------------------|---------------------|------------|-------------|
| galangin   | 0.700               | 0.625               | 89.3%      | 8.99%       |
|            | 0.700               | 0.656               | 93.7%      |             |
|            | 0.700               | 0.742               | 106%       |             |
| kaempferol | 1.39                | 1.17                | 84.2%      | 9.07%       |
|            | 1.39                | 1.31                | 94.2%      |             |
|            | 1.39                | 1.41                | 101%       |             |

**Table S5 Recovery of flavonoids in chamomile**

| Analytes     | Added amount<br>( $\mu\text{g/g}$ ) | Found amount<br>( $\mu\text{g/g}$ ) | Recoveries | RSD<br>(n = 3) |
|--------------|-------------------------------------|-------------------------------------|------------|----------------|
| kaempferide  | 1.13                                | 1.05                                | 92.9%      | 8.01%          |
|              | 1.13                                | 1.23                                | 109%       |                |
|              | 1.13                                | 1.16                                | 103%       |                |
| galangin     | 2.25                                | 2.16                                | 96.0%      | 5.91%          |
|              | 2.25                                | 2.38                                | 106%       |                |
|              | 2.25                                | 2.40                                | 107%       |                |
| isorhamnetin | 0.650                               | 0.617                               | 94.9%      | 3.85%          |
|              | 0.650                               | 0.626                               | 96.3%      |                |
|              | 0.650                               | 0.666                               | 102%       |                |
| kaempferol   | 0.716                               | 0.655                               | 91.5%      | 5.90%          |
|              | 0.716                               | 0.667                               | 93.2%      |                |
|              | 0.716                               | 0.727                               | 102%       |                |
| quercetin    | 0.250                               | 0.226                               | 90.4%      | 7.03%          |
|              | 0.250                               | 0.241                               | 96.4%      |                |
|              | 0.250                               | 0.261                               | 104%       |                |

**Table S6 Recovery of flavonoids in tangerine peel**

| Analytes   | Added amount<br>( $\mu\text{g/g}$ ) | Found amount<br>( $\mu\text{g/g}$ ) | Recoveries | RSD<br>(n = 3) |
|------------|-------------------------------------|-------------------------------------|------------|----------------|
| kaempferol | 0.700                               | 0.650                               | 92.8%      | 7.59%          |
|            | 0.700                               | 0.716                               | 102%       |                |
|            | 0.700                               | 0.756                               | 108%       |                |

**Table S7 Recovery of flavonoids in cacumen biot**

| Analytes  | Added amount (µg/g) | Found amount (µg/g) | Recoveries | RSD (n = 3) |
|-----------|---------------------|---------------------|------------|-------------|
| quercetin | 0.362               | 0.340               | 93.9%      | 6.75%       |
|           | 0.362               | 0.375               | 104%       |             |
|           | 0.362               | 0.386               | 107%       |             |
